# Supplementary material for: Design, preparation and characterization of Fe3O4@SiO2@ECH@thiocarbazide@Au(i)@chitosan nanoparticles as a catalyst for the synthesis of 3,4-dihydropyrano[3,2-c]chromenes
Source: Royal Society of Chemistry journal article supplement (doi:10.1039/d2nj05229f), 2022-12-20
Supplement: d2nj05229f1.pdf [file d2nj05229f1.pdf]

# Supplementary data

## Design, preparation and characterization of

## $\text{Fe}_3\text{O}_4@\text{SiO}_2@\text{ECH}@\text{Thiocarbazide}@\text{Au(III)}@\text{Chitosan}$ nanoparticles as a catalyst for the synthesis of 3, 4-dihydropyrano [3,2 -c]chromenes

Elahe Gholamiyan Karkon, Hossein Mostafavi\*

Department of Organic chemistry & Biochemistry, Faculty of Chemistry, University of Tabriz, Tabriz, Iran, P.O. Box: 5166614766, Fax: +98-4133340191. Tel: +98-4133393133

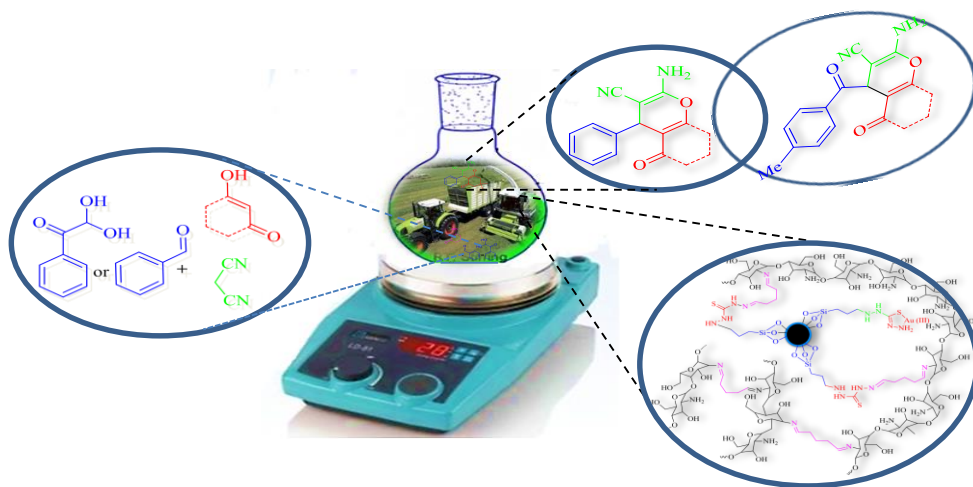

### Table of content S

|                                                                                                               |        |
|---------------------------------------------------------------------------------------------------------------|--------|
| SEM of<br>$\text{Fe}_3\text{O}_4@\text{SiO}_2@\text{ECH}@\text{Thiocarbazide}@\text{Au(III)}@\text{Chitosan}$ | S1-2   |
| FT-IR and HNMR<br>Table 2                                                                                     | S4-13  |
| FT-IR and HNMR<br>Table 3                                                                                     | S14-17 |

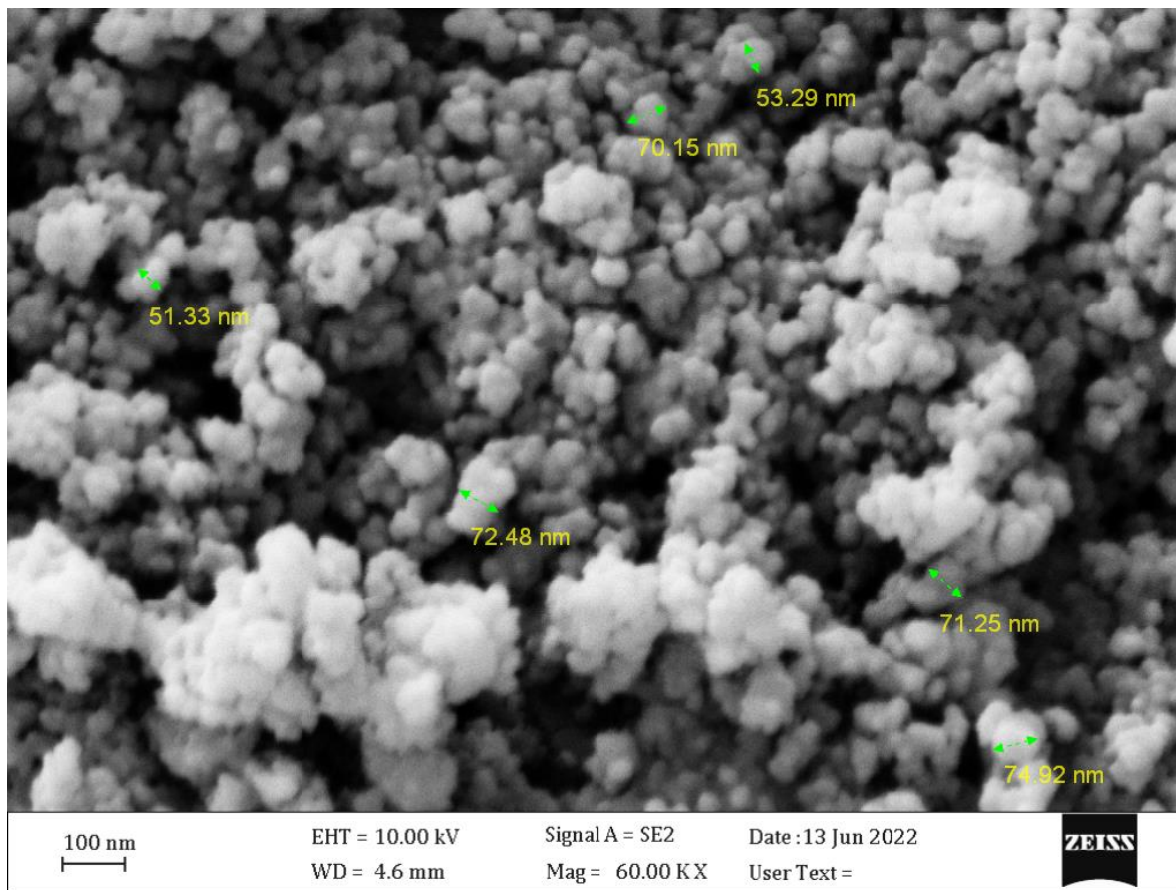

Figure 1: SEM image of  $\text{Fe}_3\text{O}_4@\text{SiO}_2@\text{ECH}@\text{Thiocarbazide}@\text{Au(III)}@\text{Chitosan}$

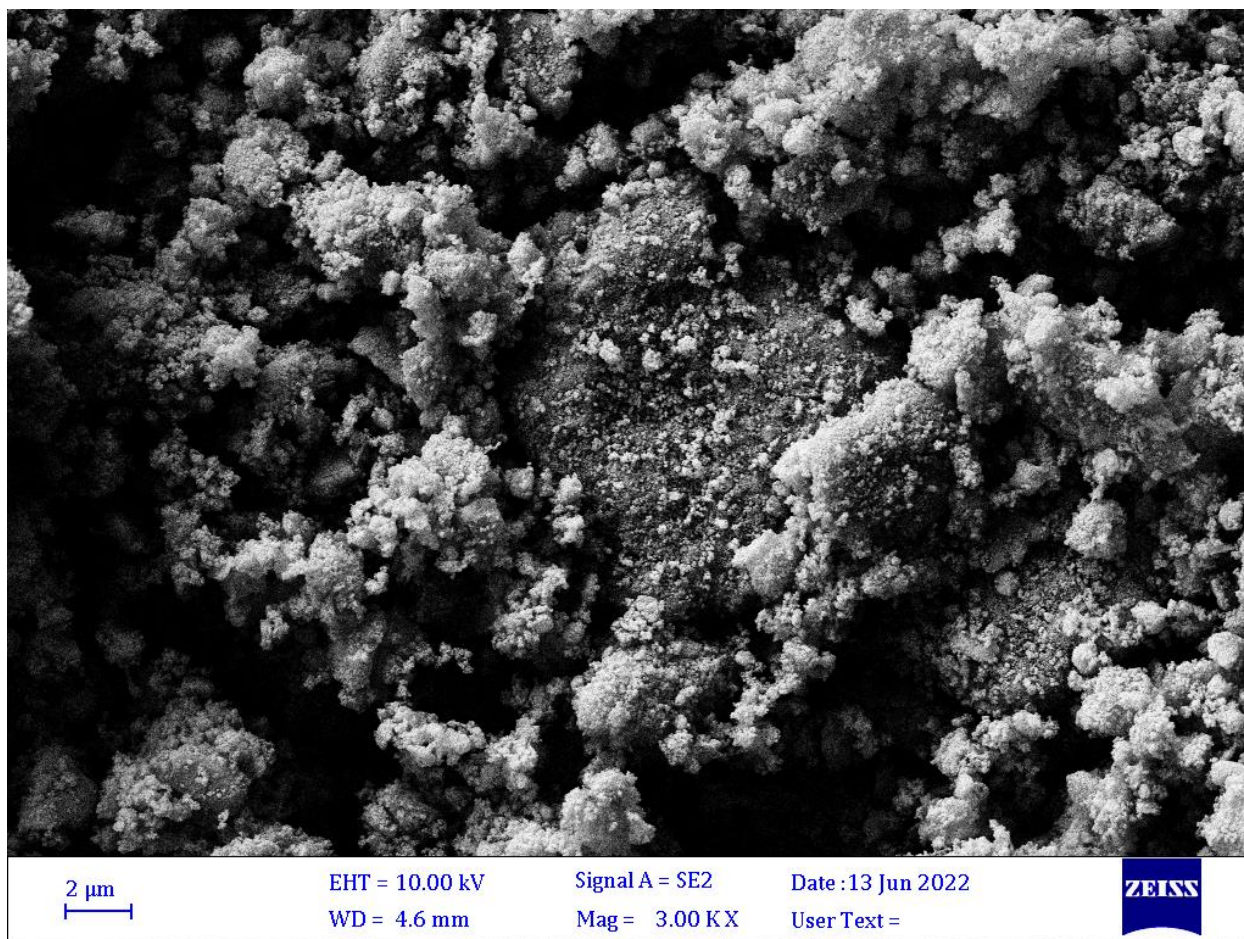

Figure 2: SEM image of  $\text{Fe}_3\text{O}_4@\text{SiO}_2@\text{ECH}@\text{Thiocarbazide}@\text{Au(III)}@\text{Chitosan}$

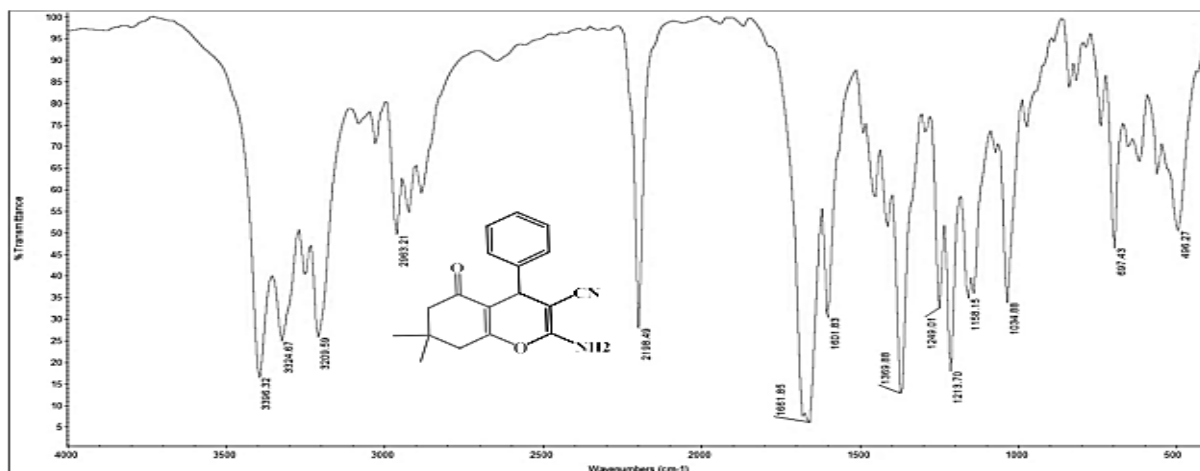

Figure 3: FT-IR spectrum of 2-amino-7,7-dimethyl-5-oxo-4-phenyl-5,6,7,8-tetrahydro-4H-chromene-3-carbonitrile

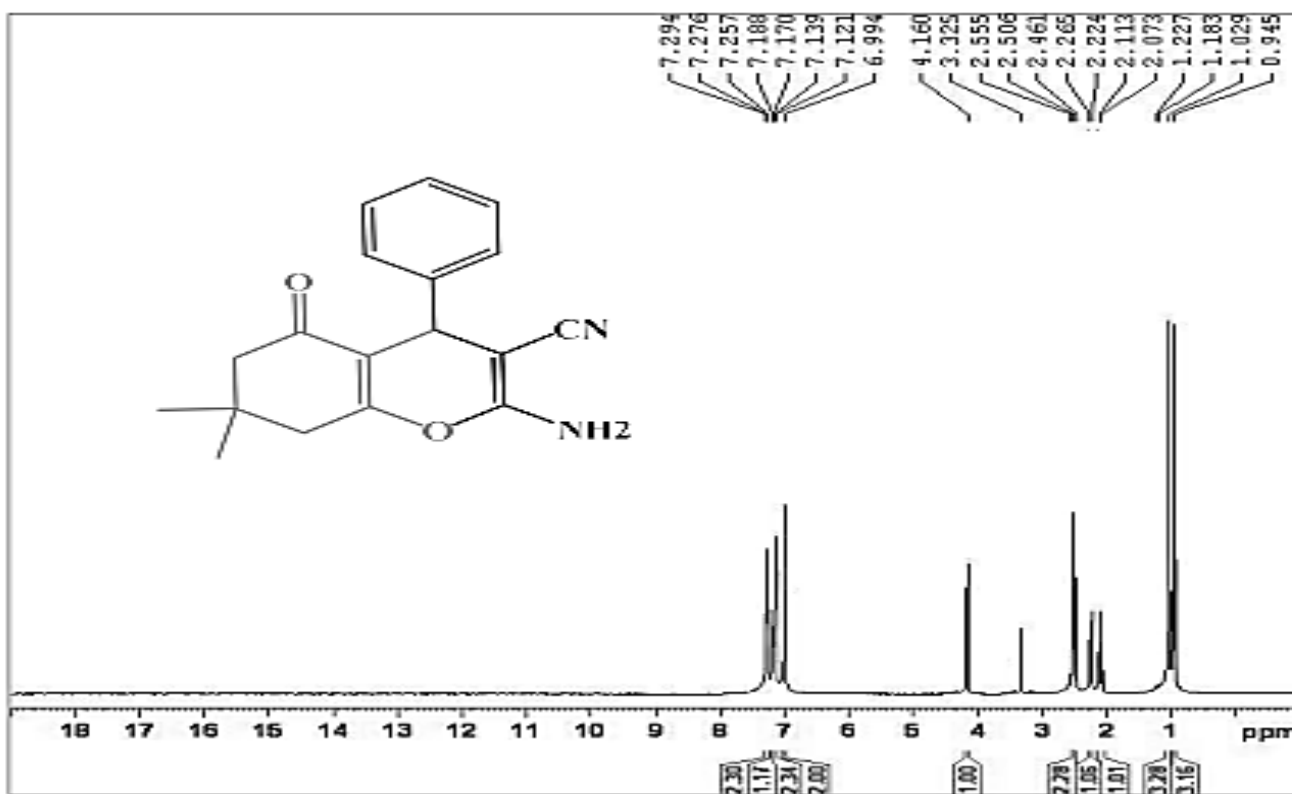

Figure 4: <sup>1</sup>H NMR (CDCl<sub>3</sub>, 400 MHz) spectrum of 2-amino-7,7-dimethyl-5-oxo-4-phenyl-5,6,7,8-tetrahydro-4H-chromene-3-carbonitrile

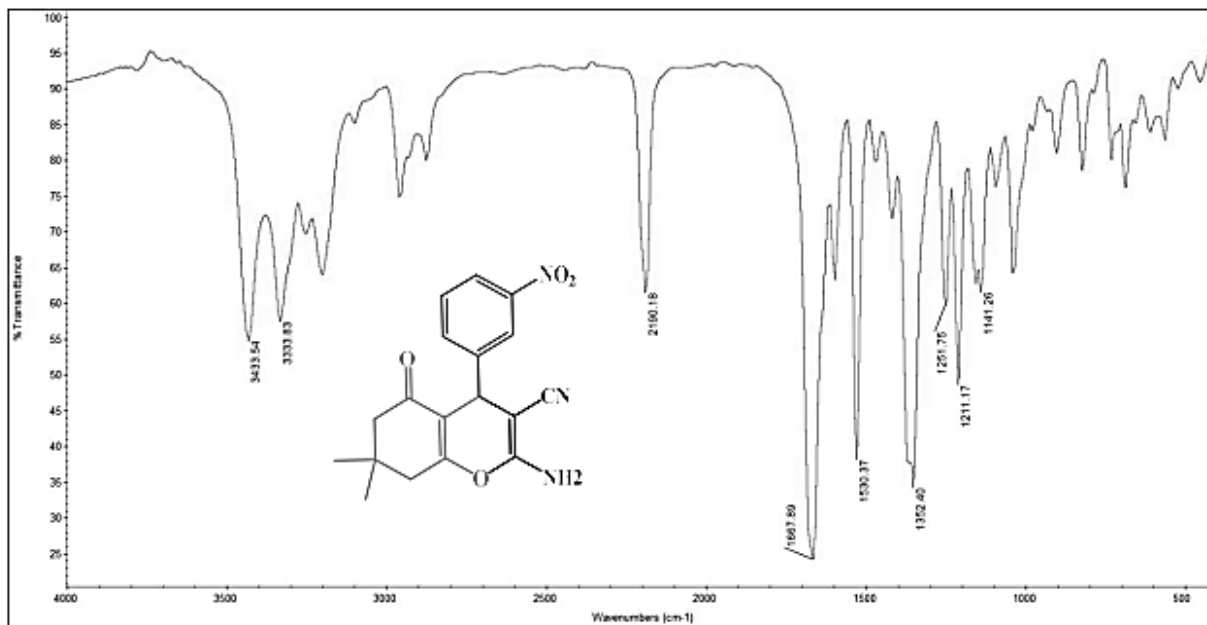

Figure 5: FT-IR spectrum of 2-amino-7,7-dimethyl-4-(3-nitrophenyl)-5-oxo-5,6,7,8-tetrahydro-4H-chromene-3-carbonitrile

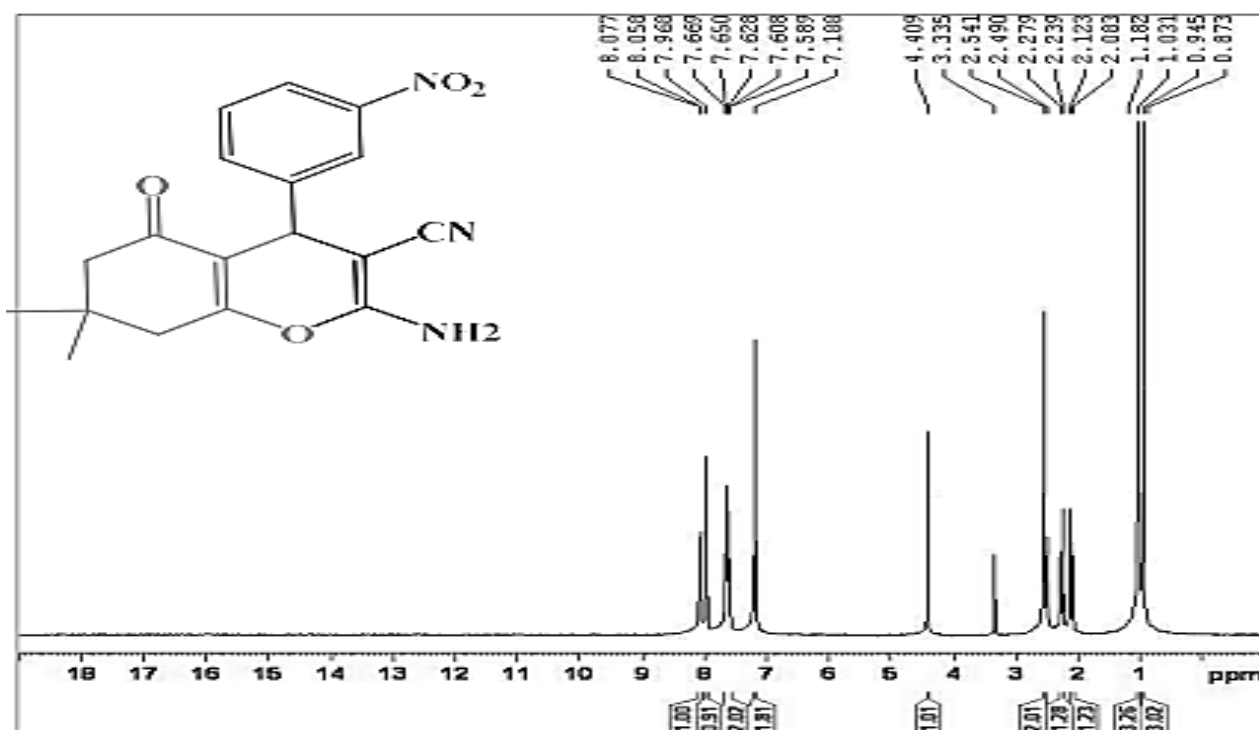

Figure 6: <sup>1</sup>H NMR (CDCl<sub>3</sub>, 400 MHz) spectrum of 2-amino-7,7-dimethyl-4-(3-nitrophenyl)-5-oxo-5,6,7,8-tetrahydro-4H-chromene-3-carbonitrile

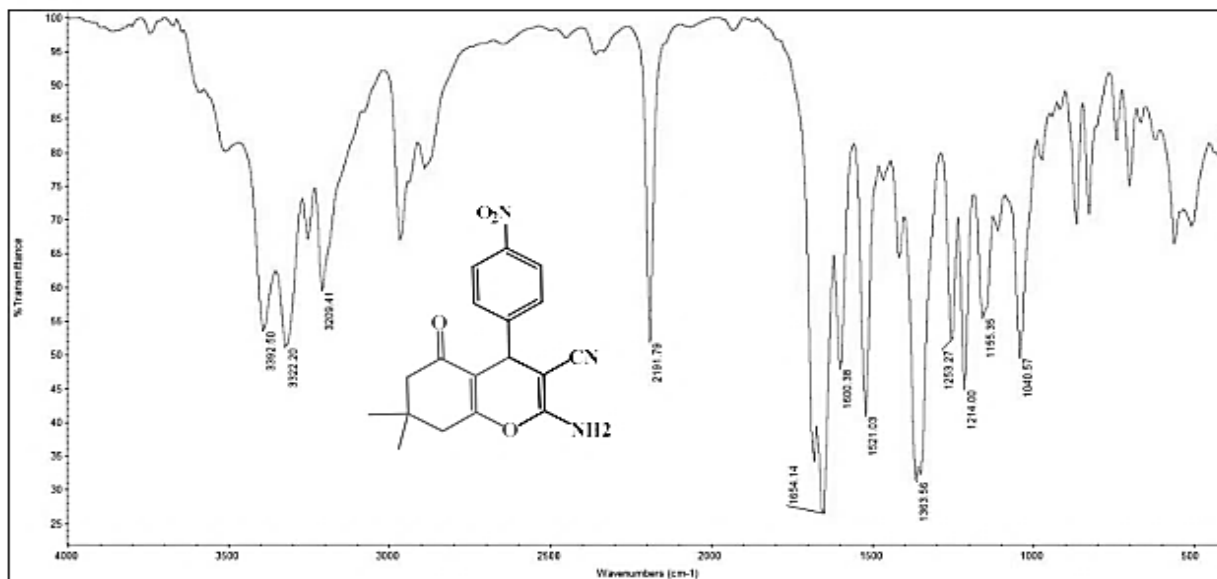

Figure 7: FT-IR spectrum of 2-amino-7,7-dimethyl-4-(4-nitrophenyl)-5-oxo-5,6,7,8-tetrahydro-4H-chromene-3-carbonitrile

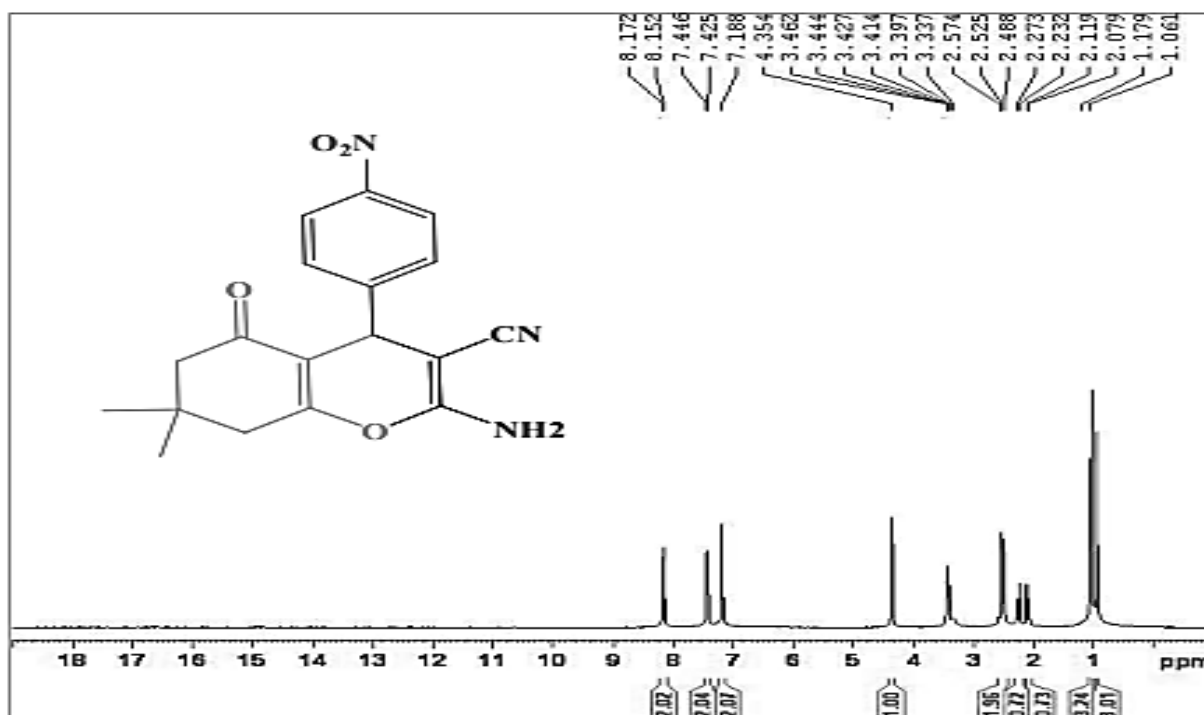

Figure 8: <sup>1</sup>H NMR (CDCl<sub>3</sub>, 400 MHz) spectrum of 2-amino-7,7-dimethyl-4-(4-nitrophenyl)-5-oxo-5,6,7,8-tetrahydro-4H-chromene-3-carbonitrile

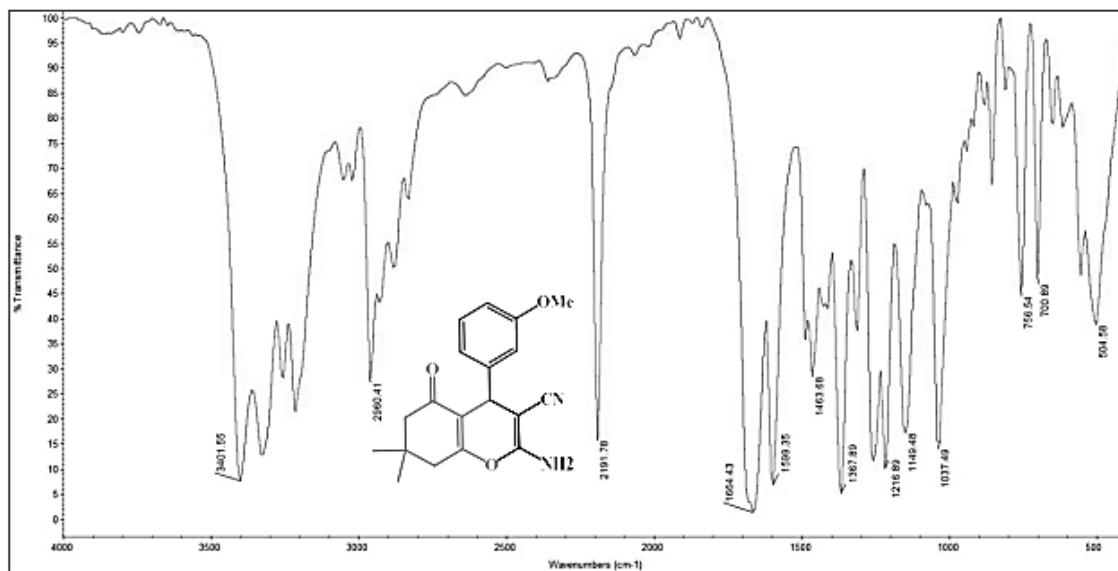

Figure 9: FT-IR spectrum of 2-amino-4-(3-methoxyphenyl)-7,7-dimethyl-5-oxo-5,6,7,8-tetrahydro-4H-chromene-3-carbonitrile

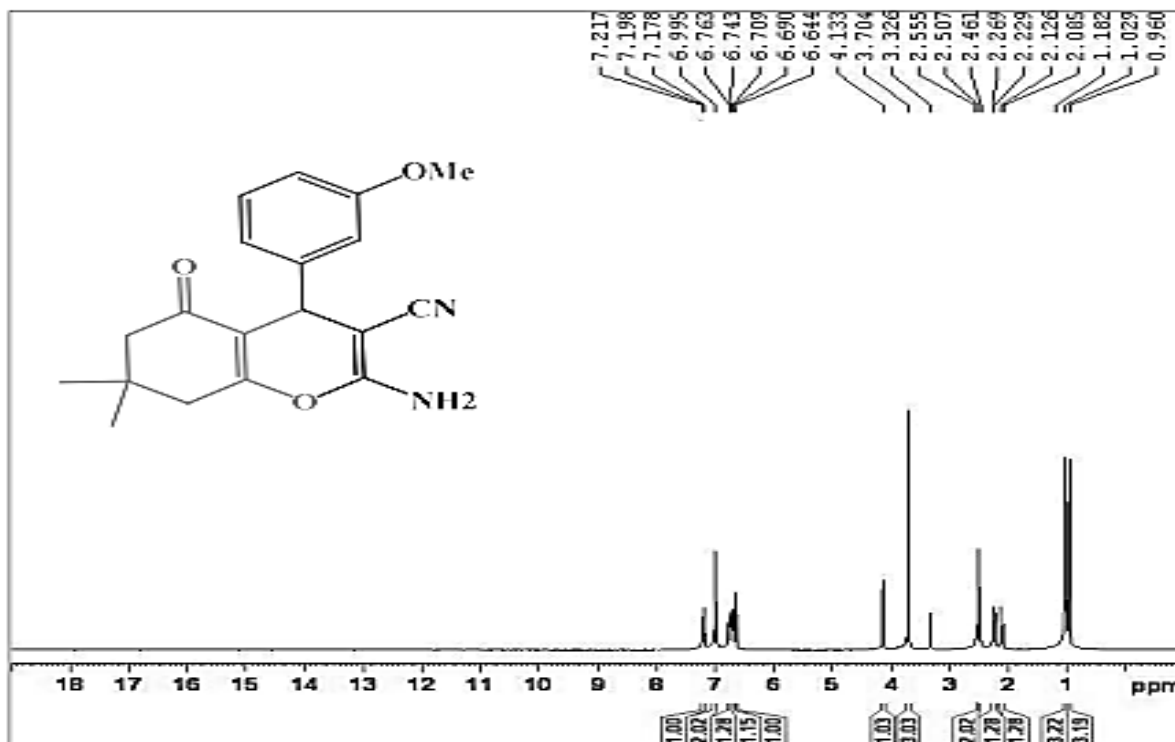

Figure 10:  $^1\text{H}$ NMR ( $\text{CDCl}_3$ , 400 MHz) spectrum of 2-amino-4-(3-methoxyphenyl)-7,7-dimethyl-5-oxo-5,6,7,8-tetrahydro-4H-chromene-3-carbonitrile

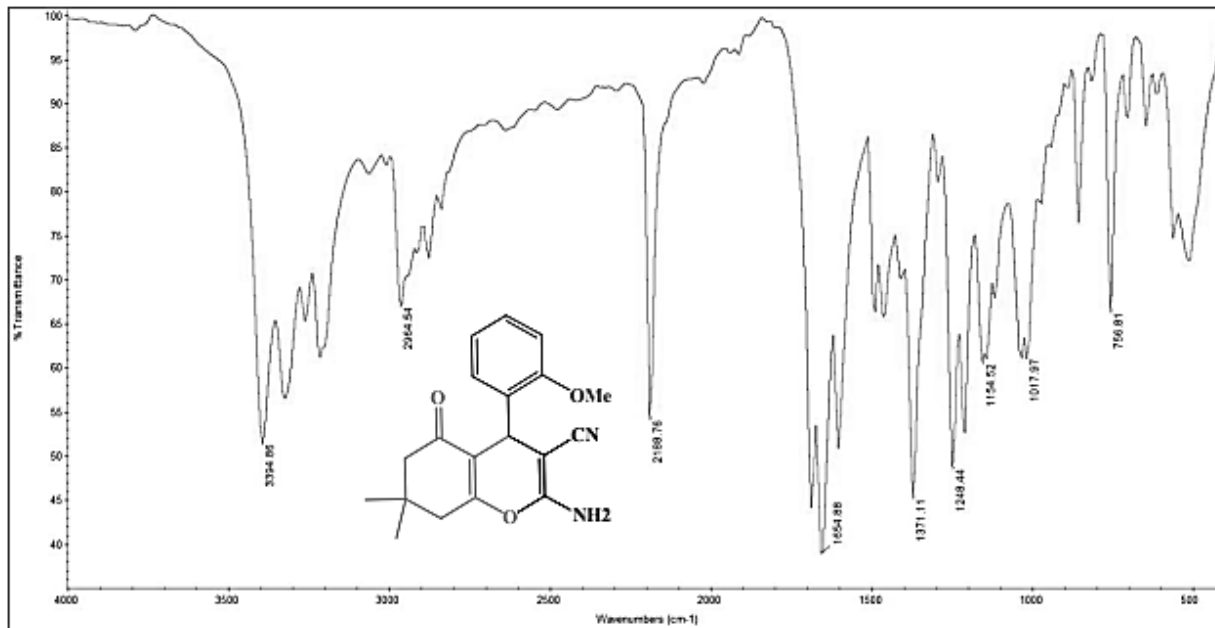

Figure 11: FTIR spectrum of 2-amino-4-(2-methoxyphenyl)-7,7-dimethyl-5-oxo-5,6,7,8-tetrahydro-4H-chromene-3-carbonitrile

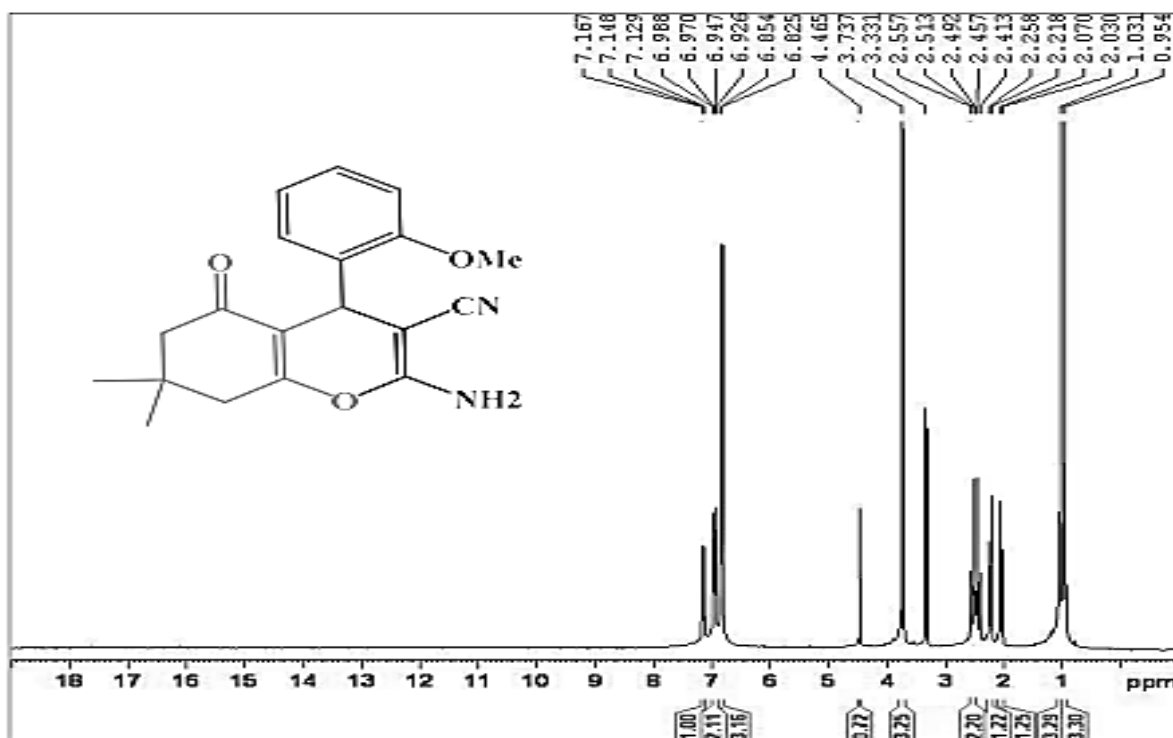

Figure 12: <sup>1</sup>H NMR (CDCl<sub>3</sub>, 400 MHz) spectrum of 2-amino-4-(2-methoxyphenyl)-7,7-dimethyl-5-oxo-5,6,7,8-tetrahydro-4H-chromene-3-carbonitrile



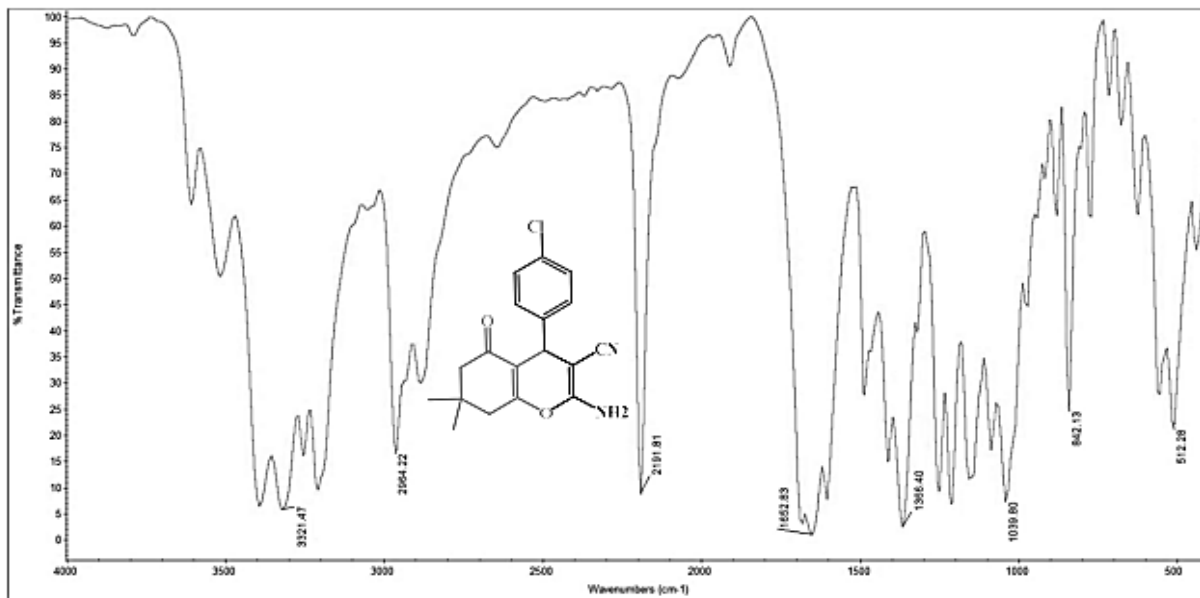

Figure 13: FT-IR spectrum of 2-amino-4-(4-chlorophenyl)-7,7-dimethyl-5-oxo-5,6,7,8-tetrahydro-4H-chromene-3-carbonitrile

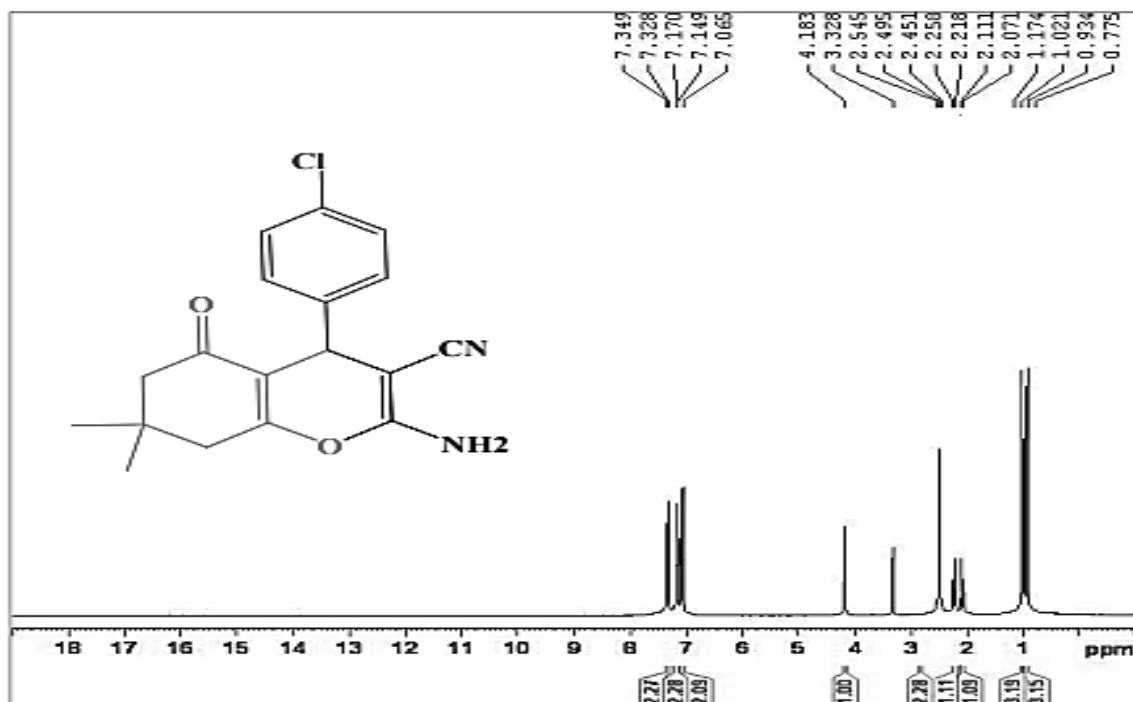

Figure 14: <sup>1</sup>H NMR (CDCl<sub>3</sub>, 400 MHz) spectrum of 2-amino-4-(4-chlorophenyl)-7,7-dimethyl-5-oxo-5,6,7,8-tetrahydro-4H-chromene-3-carbonitrile

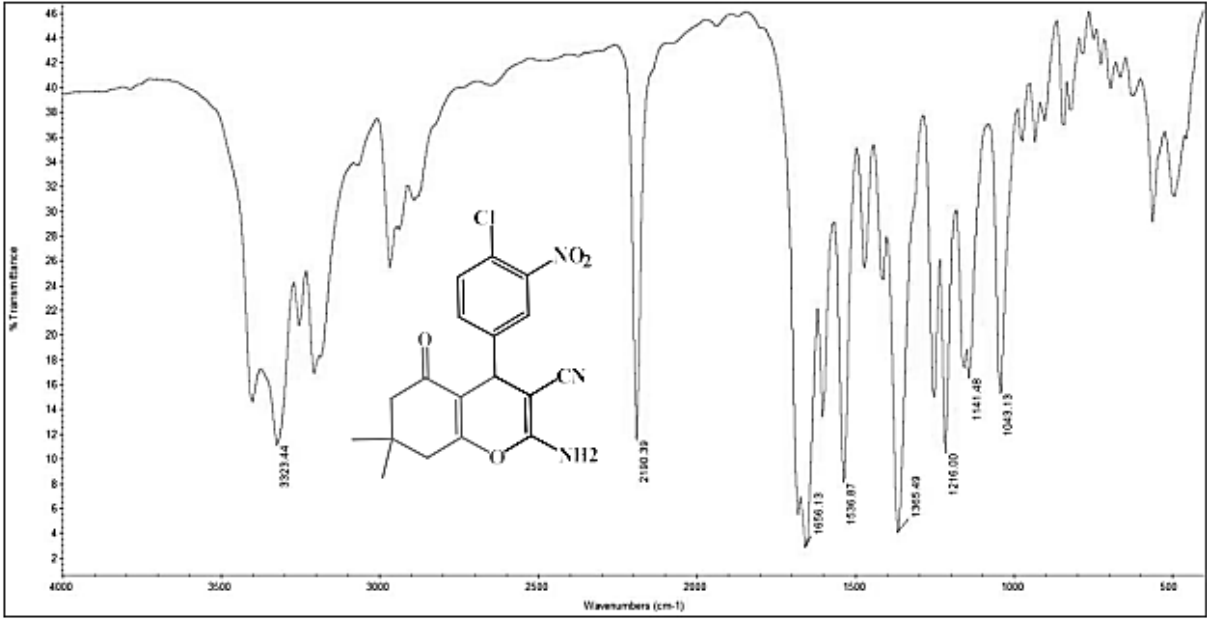

Figure 15: FT-IR spectrum of 2-amino-4-(4-chloro-3-nitrophenyl)-7,7-dimethyl-5-oxo-5,6,7,8-tetrahydro-4H-chromene-3-carbonitrile

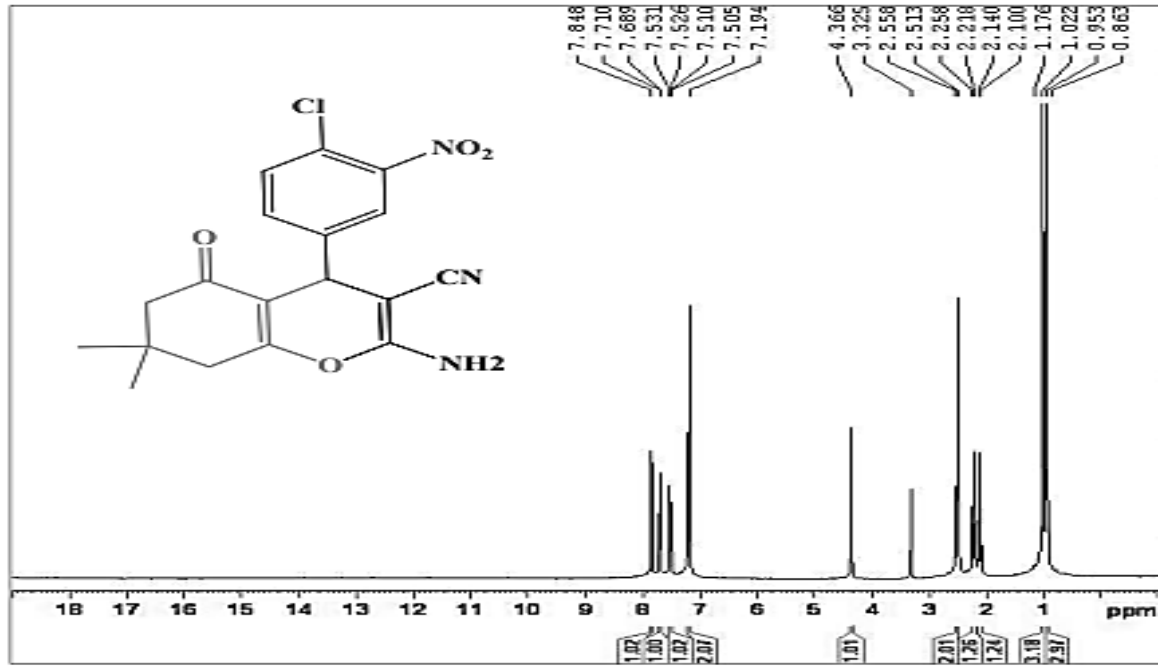

Figure S16: <sup>1</sup>H NMR (CDCl<sub>3</sub>, 400 MHz) spectrum of 2-amino-4-(4-chloro-3-nitrophenyl)-7,7-dimethyl-5-oxo-5,6,7,8-tetrahydro-4H-chromene-3-carbonitrile

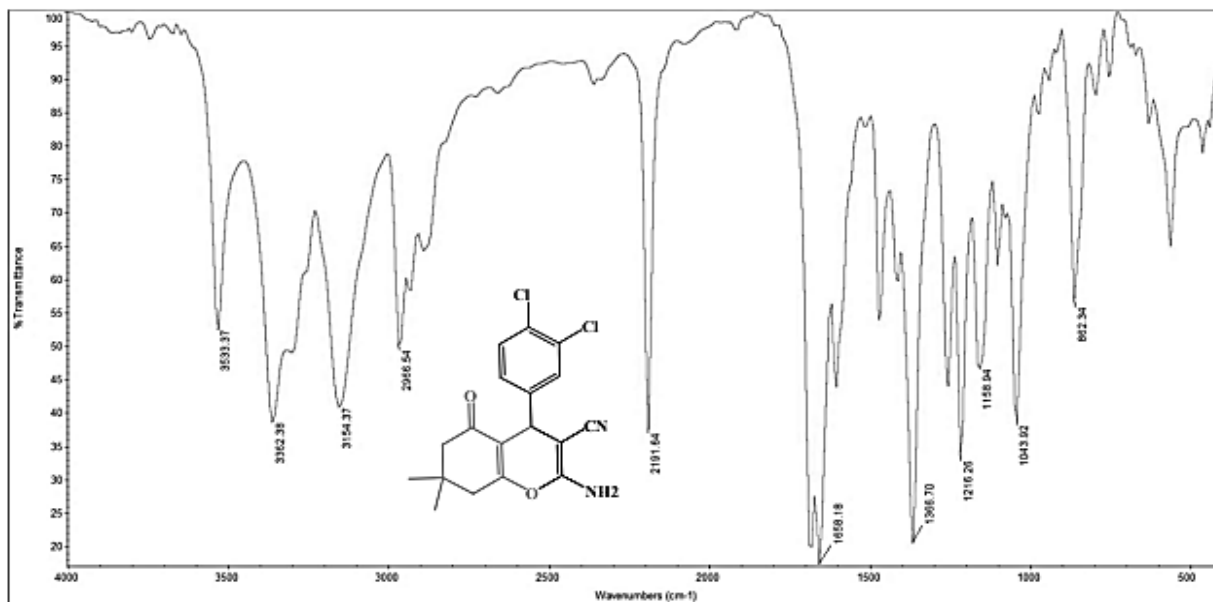

Figure 17: FT-IR spectrum of 2-amino-4-(3,4-dichlorophenyl)-7,7-dimethyl-5-oxo-5,6,7,8-tetrahydro-4H-chromene-3-carbonitrile

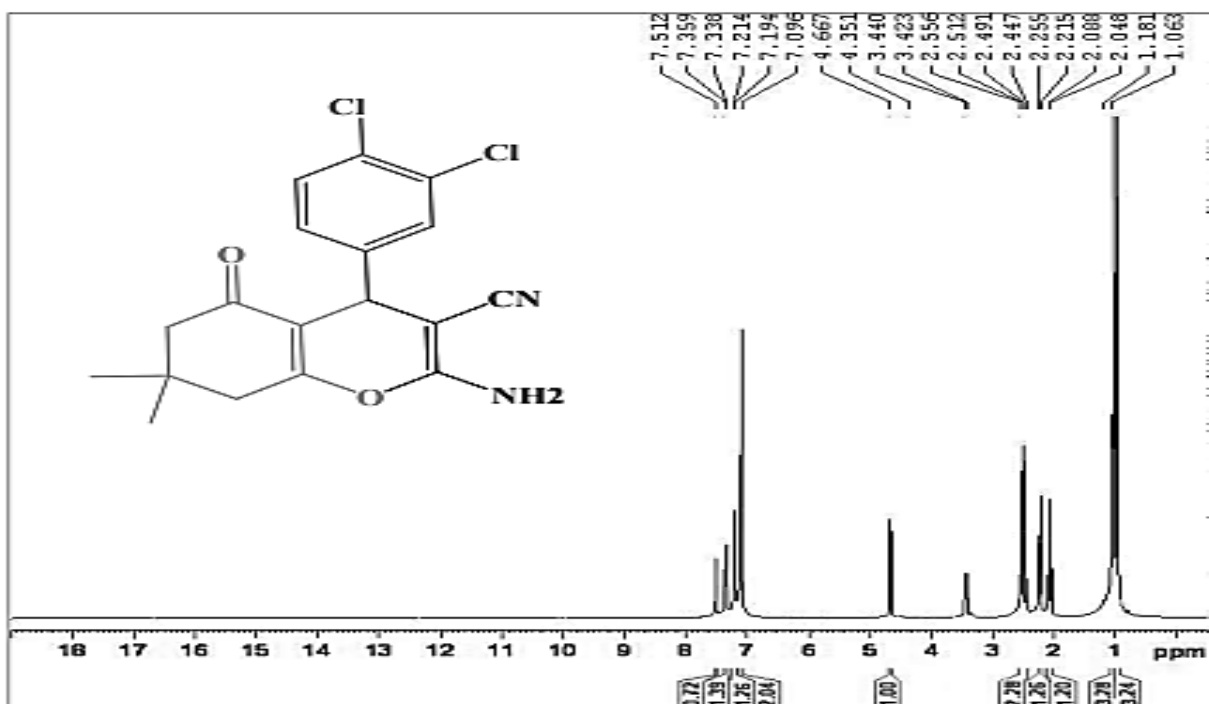

Figure S18: <sup>1</sup>H NMR (CDCl<sub>3</sub>, 400 MHz) spectrum of 2-amino-4-(3,4-dichlorophenyl)-7,7-dimethyl-5-oxo-5,6,7,8-tetrahydro-4H-chromene-3-carbonitrile

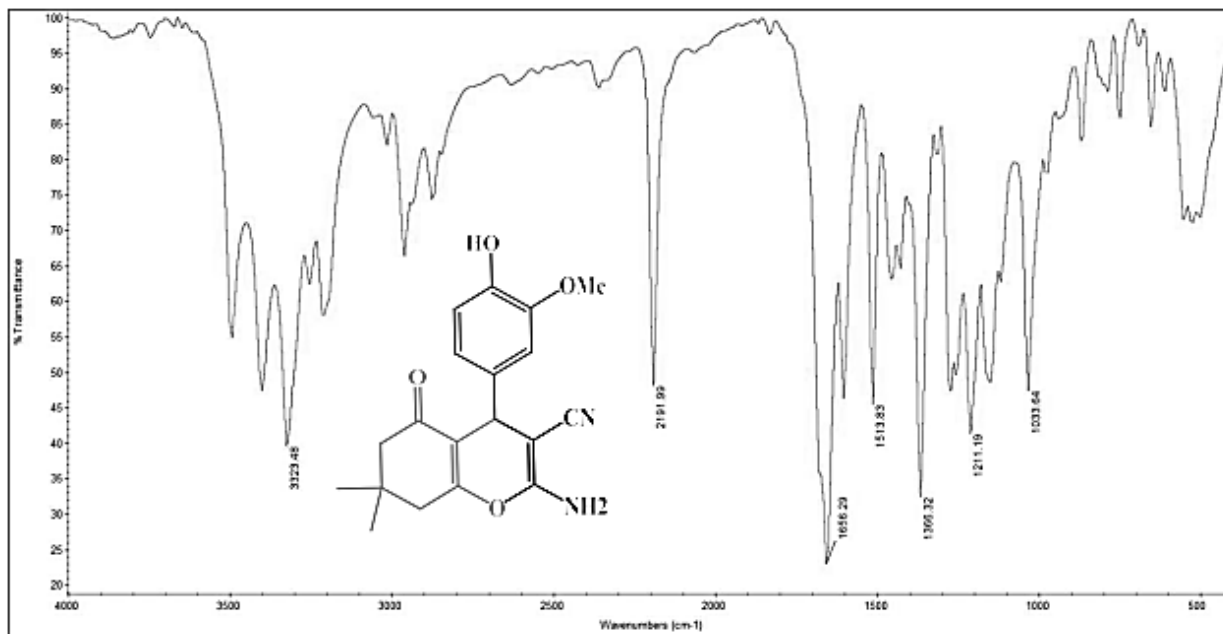

Figure 19: FT-IR spectrum of 2-amino-4-(4-hydroxy-3-methoxyphenyl)-7,7-dimethyl-5-oxo-5,6,7,8-tetrahydro-4H-chromene-3-carbonitrile

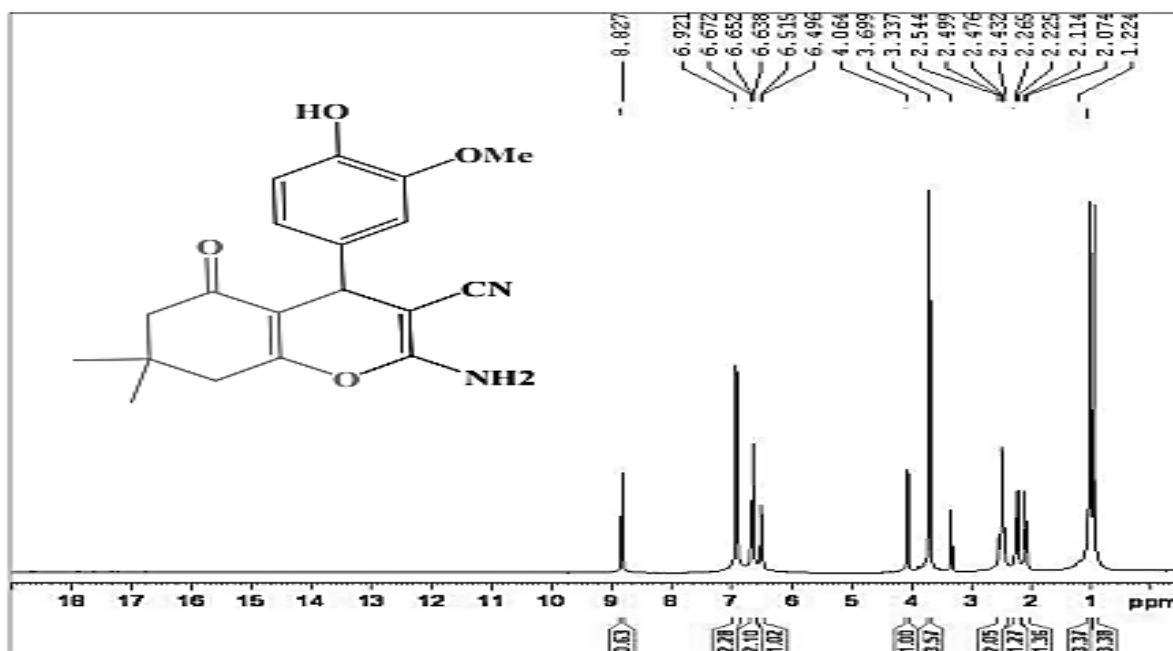

Figure 20: <sup>1</sup>H NMR (CDCl<sub>3</sub>, 400 MHz) spectrum of 2-amino-4-(4-hydroxy-3-methoxyphenyl)-7,7-dimethyl-5-oxo-5,6,7,8-tetrahydro-4H-chromene-3-carbonitrile

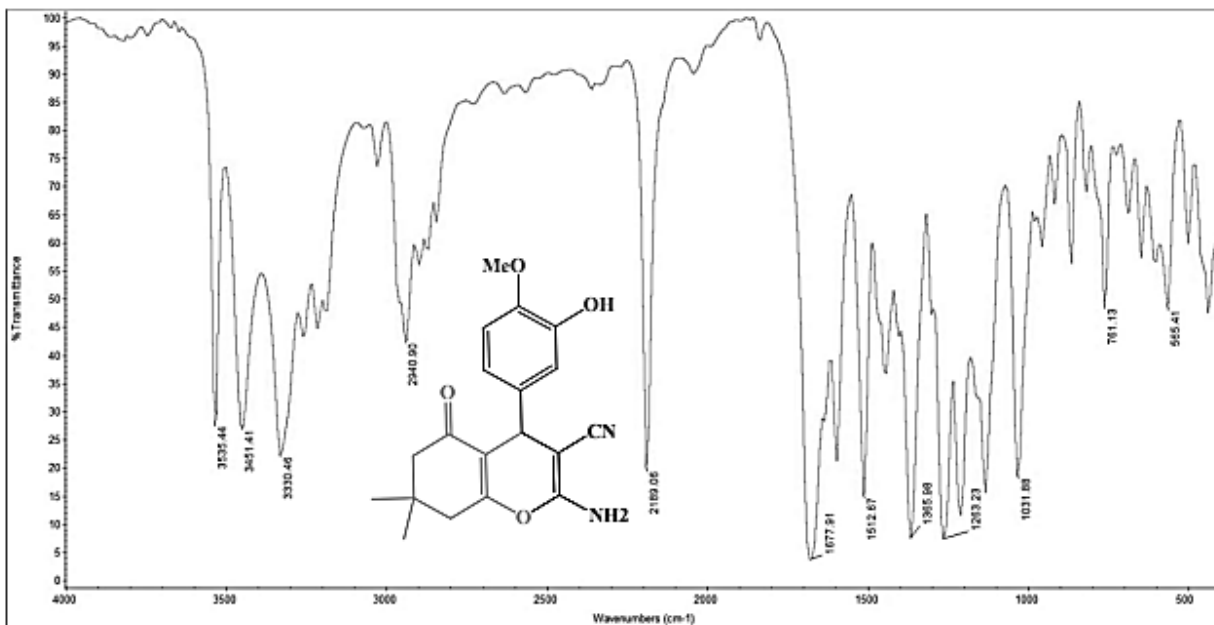

Figure 21: FT-IR spectrum of 2-amino-4-(3-hydroxy-4-methoxyphenyl)-7,7-dimethyl-5-oxo-5,6,7,8-tetrahydro-4H-chromene-3-carbonitrile

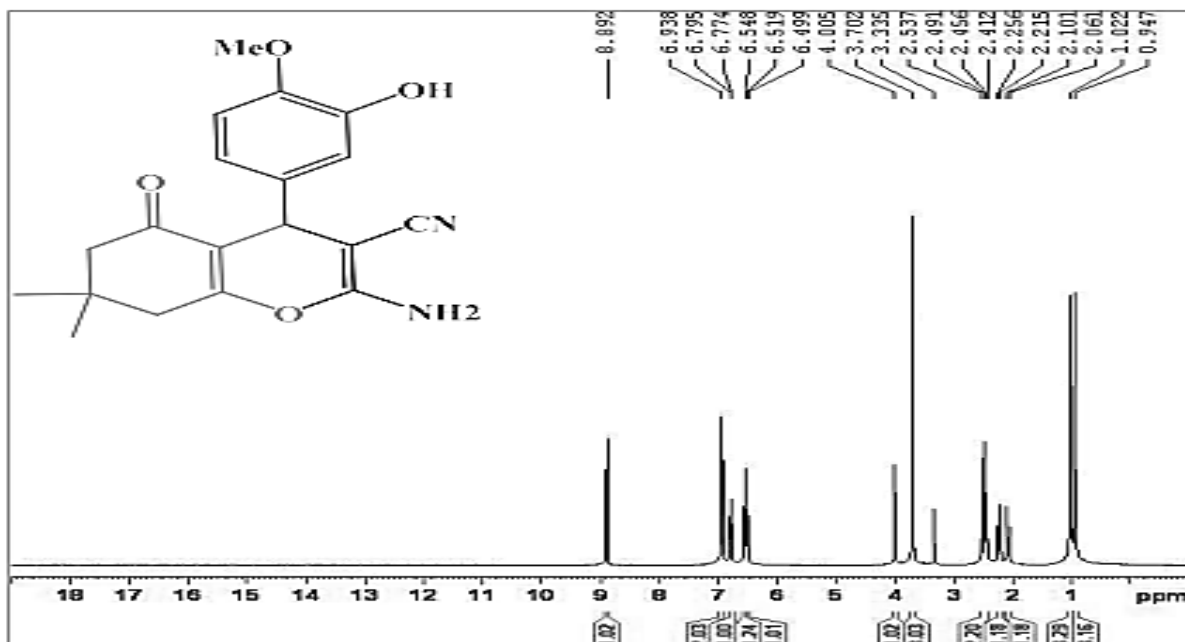

Figure 22: <sup>1</sup>H NMR (CDCl<sub>3</sub>, 400 MHz) spectrum of 2-amino-4-(3-hydroxy-4-methoxyphenyl)-7,7-dimethyl-5-oxo-5,6,7,8-tetrahydro-4H-chromene-3-carbonitrile

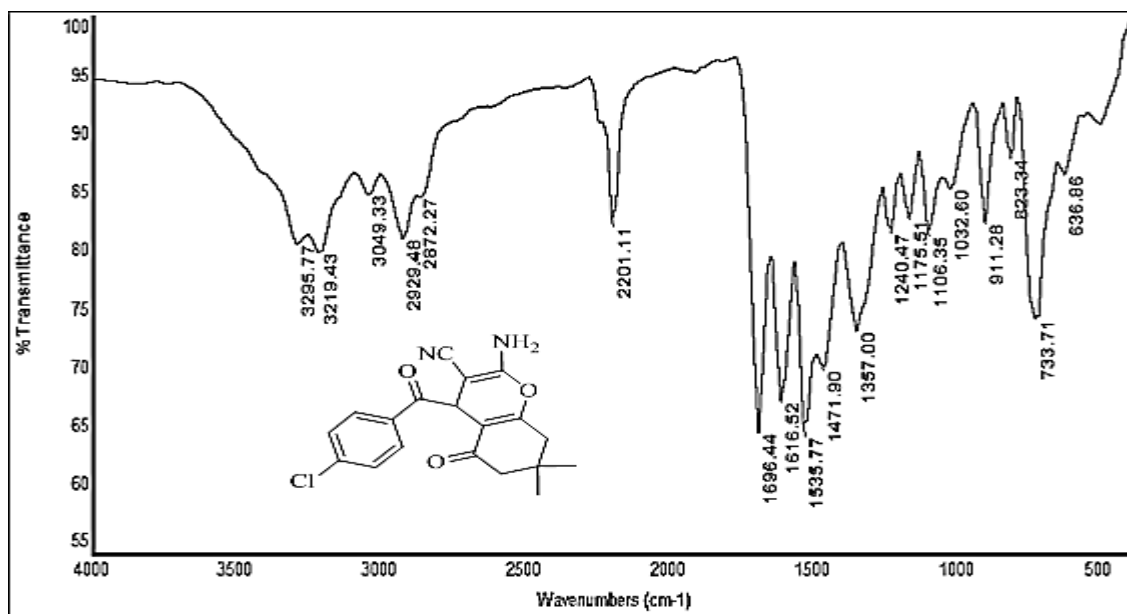

Figure 23: FT-IR spectrum of 2-Amino-4-(4-chlorobenzoyl)-7,7-dimethyl-5-oxo-5,6,7,8-tetrahydro-4H-chromene-3-carbonitrile

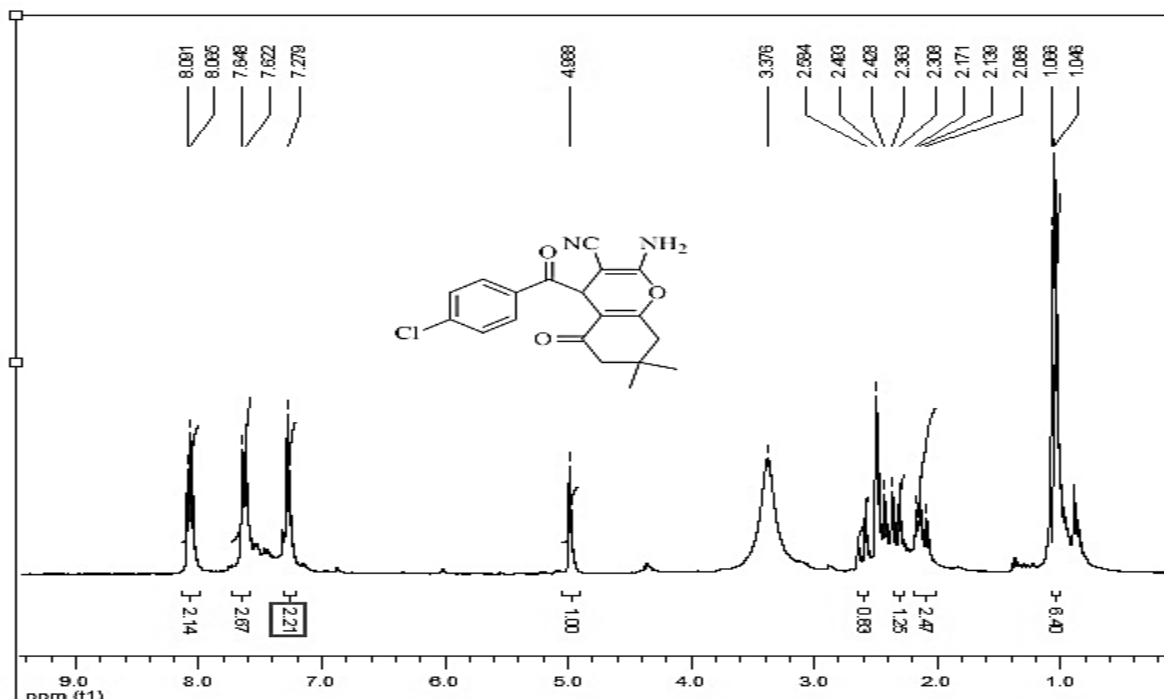

Figure 24: <sup>1</sup>H NMR (DMSO-d<sub>6</sub>, 300 MHz) spectrum of 2-Amino-4-(4-chlorobenzoyl)-7,7-dimethyl-5-oxo-5,6,7,8-tetrahydro-4H-chromene-3-carbonitrile

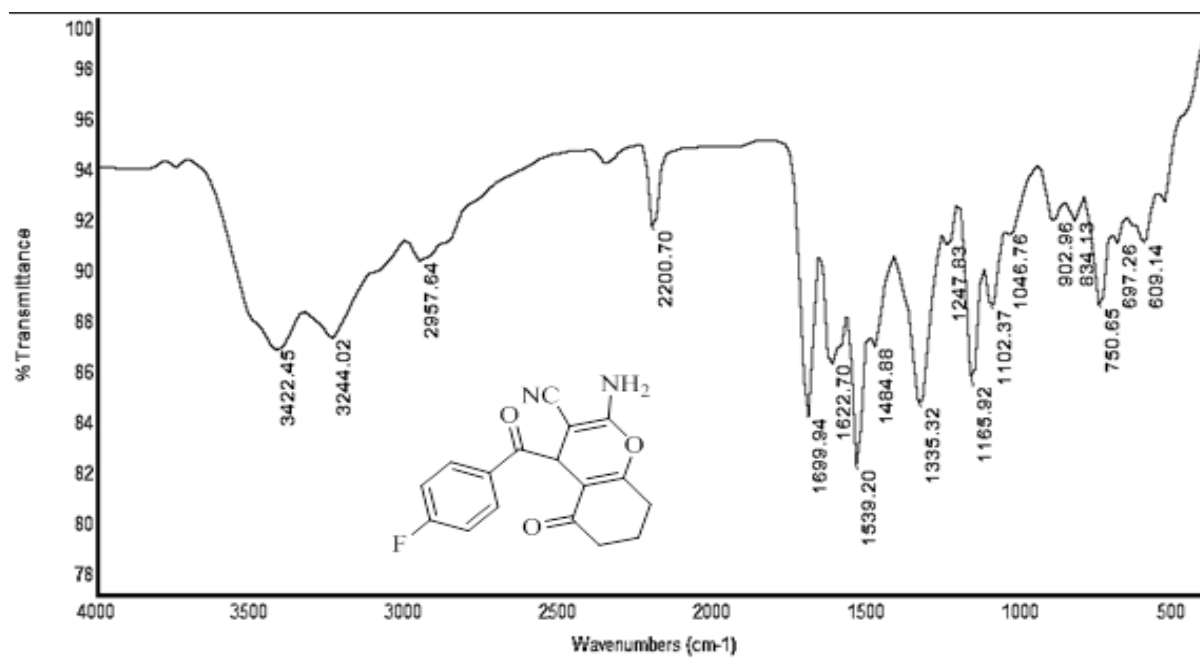

Figure 25: FT-IR spectrum of 2-Amino-4-(4-fluorobenzoyl)-5-oxo-5,6,7,8-tetrahydro-4H-chromene-3-carbonitrile

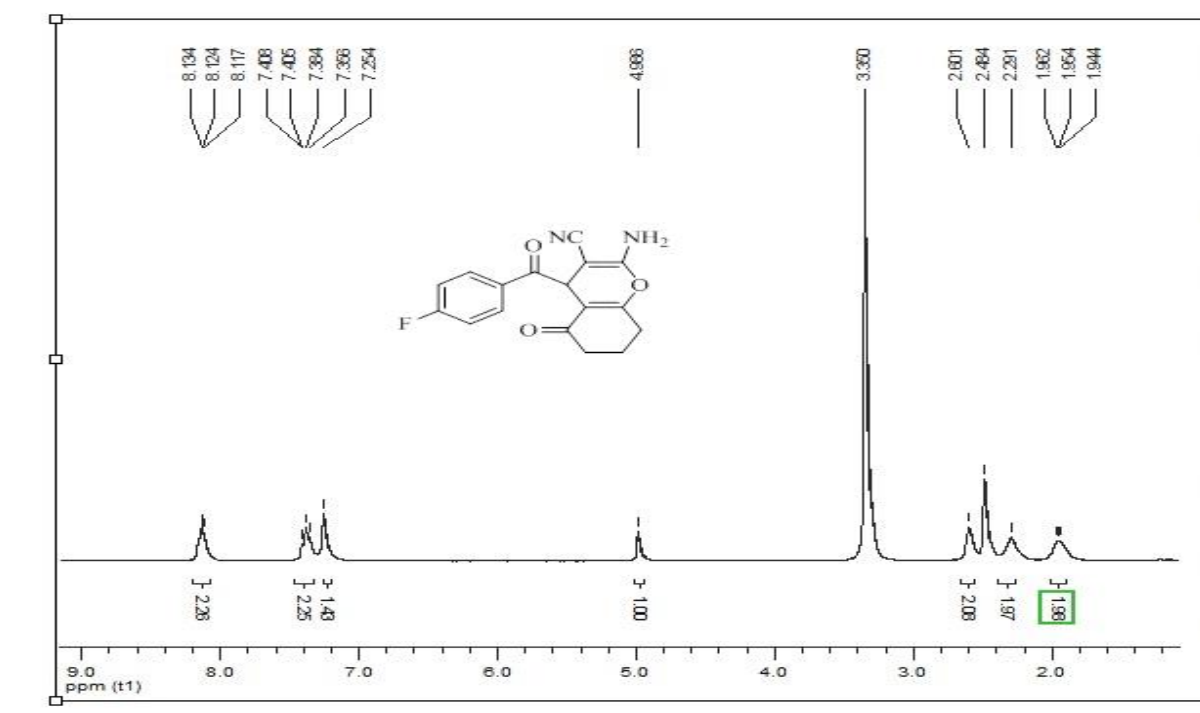

Figure 26:  $^1\text{H}$ NMR (DMSO- $d_6$ , 300 MHz) spectrum of 2-Amino-4-(4-fluorobenzoyl)-5-oxo-5,6,7,8-tetrahydro-4H-chromene-3-carbonitrile

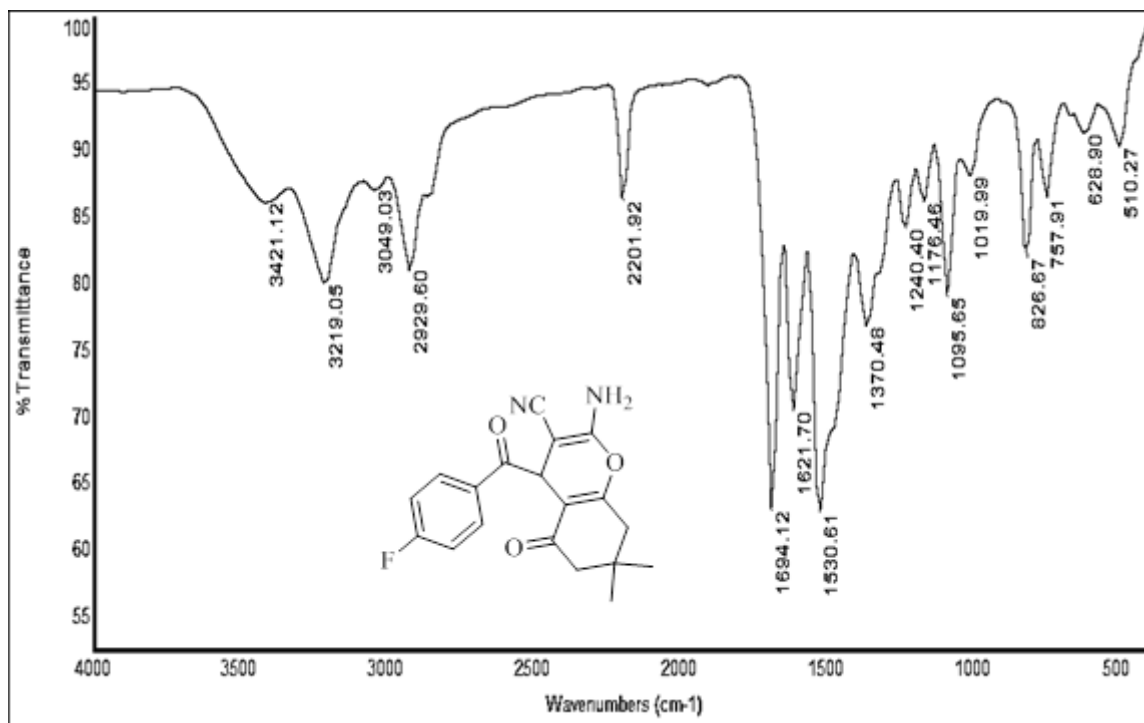

Figure 27: FT-IR spectrum of 2-Amino-4-(4-fluorobenzoyl)-7,7-dimethyl-5-oxo-5,6,7,8-tetrahydro-4H-chromene-3-carbonitrile

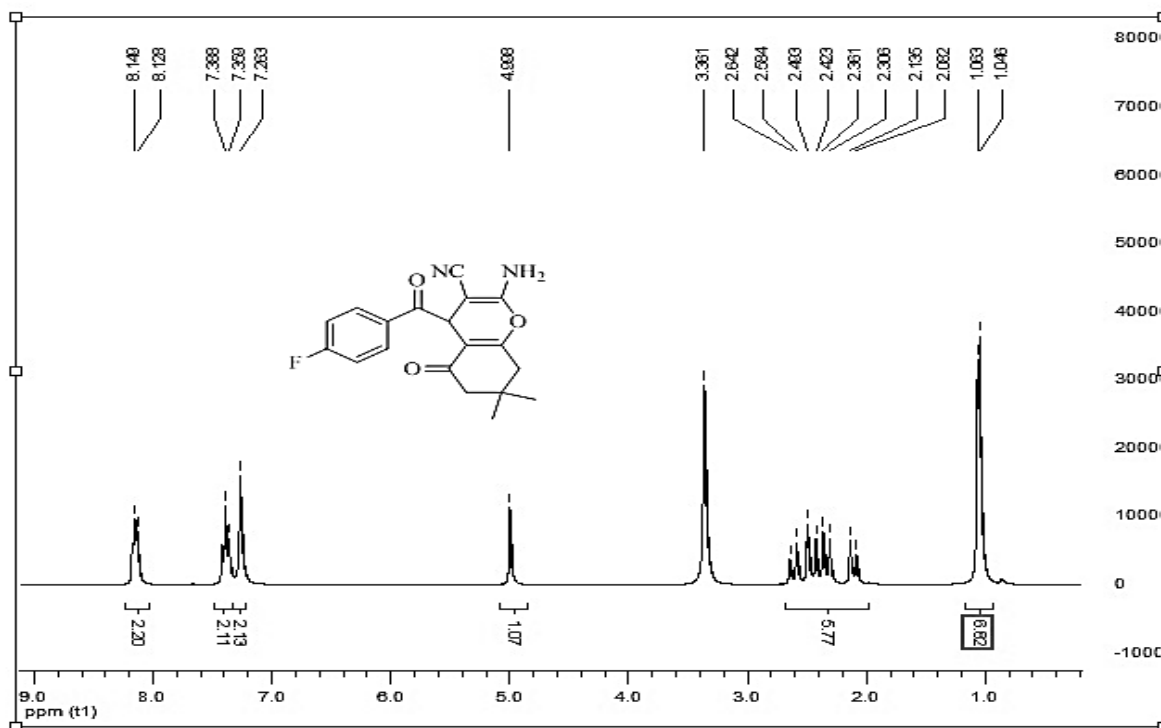

Figure 28: <sup>1</sup>H NMR (DMSO-d<sub>6</sub> 300 MHz) spectrum of 2-Amino-4-(4-fluorobenzoyl)-7,7-dimethyl-5-oxo-5,6,7,8-tetrahydro-4H-chromene-3-carbonitrile



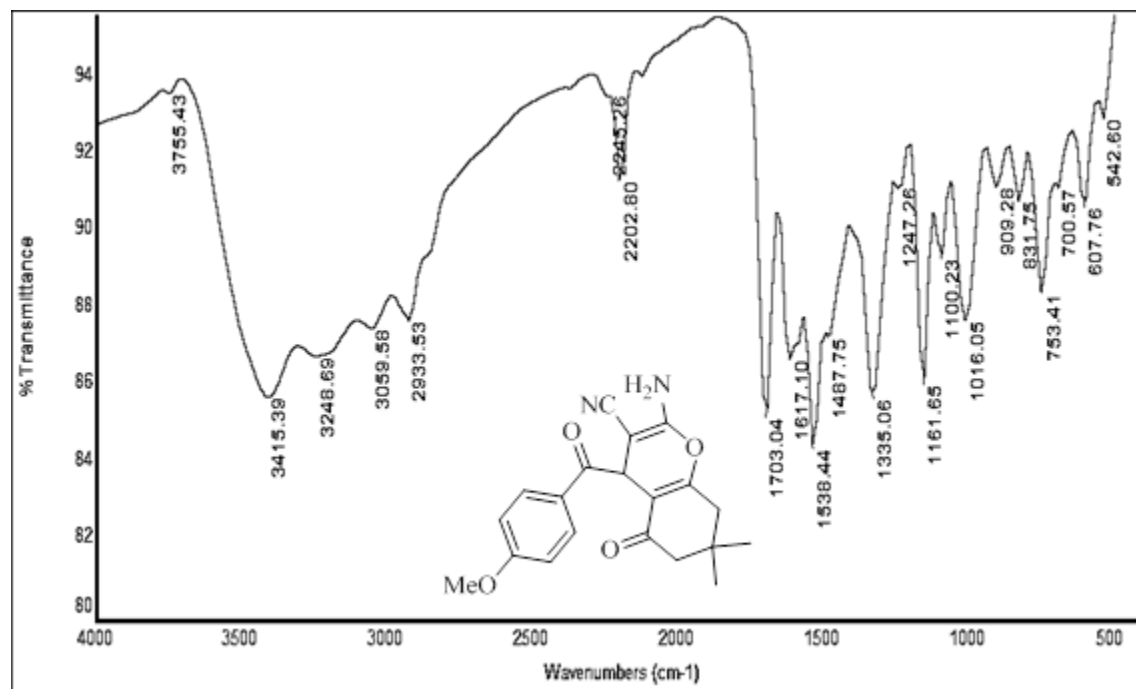

Figure 29: FT-IR spectrum of 2-Amino-4-(4-methoxybenzoyl)-7,7-dimethyl-5-oxo-5,6,7,8-tetrahydro-4H-chromene-3-carbonitrile

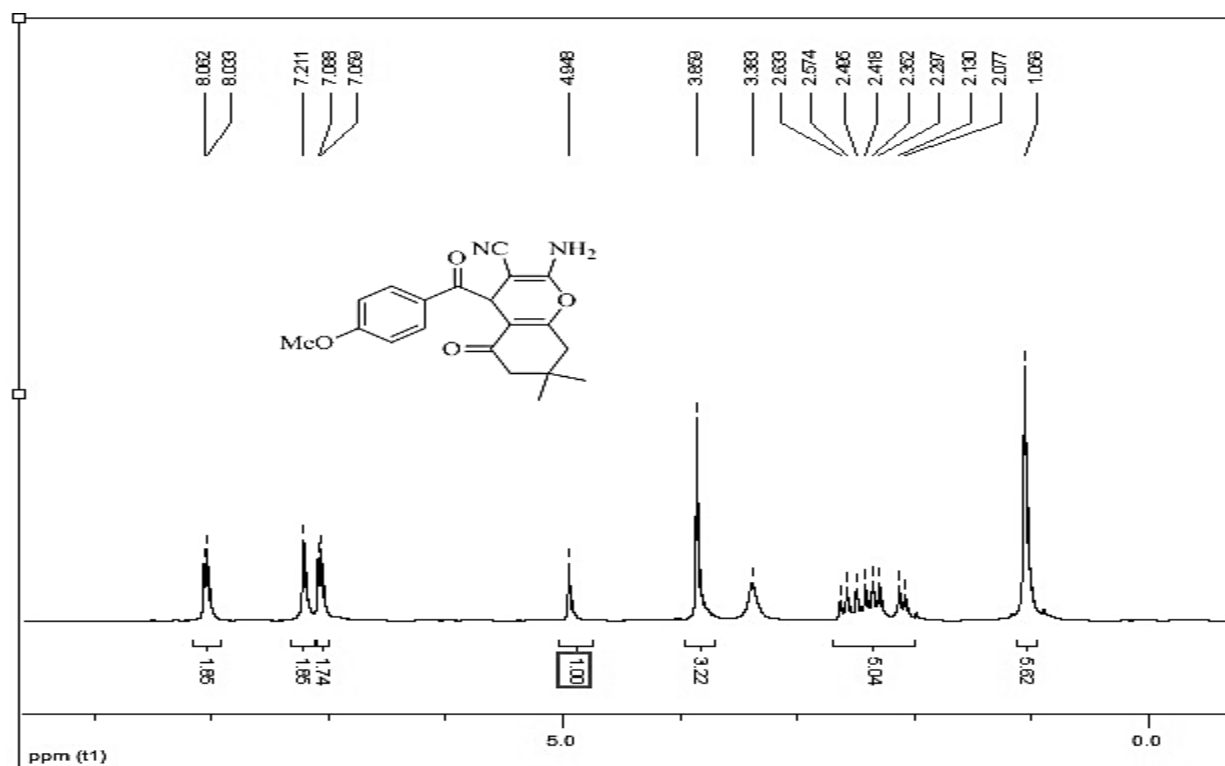

Figure 30:  $^1\text{H}$ NMR (DMSO- $d_6$  300 MHz) spectrum of 2-Amino-4-(4-methoxybenzoyl)-7,7-dimethyl-5-oxo-5,6,7,8-tetrahydro-4H-chromene-3-carbonitrile
